# Supplementary material for: Assertive Community Treatment in Veterans Affairs Settings: Impact on Adherence to Antipsychotic Medication
Source: Atypon-hosted journal article supplement (doi:10.1176/appi.ps.201100543), 2013-02-15
Supplement: 445_ds001.pdf [file 445_ds001.pdf]

**Online Data Supplement (Table 6): Exploratory Analysis: Relationship between Medication Adherence in First Year and Number of Inpatient Stays in Second Year (N=1502)**

| <b>Patient Characteristics</b>    | <b>B</b> | <b>P value</b> |
|-----------------------------------|----------|----------------|
| MPR in first year post enrollment | .16      | .34            |
| # of IP stays in first year       | .22      | <.001          |
| ACT enrollment                    | -.09     | .39            |
| Numbers of antipsychotics         | .18      | <.01           |
| Age                               | -.02     | .01            |
| Male vs female                    | .07      | .58            |
| Black vs white                    | .08      | .44            |
| Other race vs white               | -1.03    | .11            |
| Unknown race vs white             | .48      | .33            |
| Divorced vs married               | .06      | .70            |
| Single vs married                 | -.15     | .34            |
| Separated vs married              | -.05     | .79            |
| Widowed versus married            | .03      | .89            |
| Homeless versus housed            | -.01     | .90            |
| Substance use "yes"               | .38      | <.001          |
| Charlson 1 versus 0               | .03      | .72            |
| Charlson >1 versus 0              | -.10     | .60            |
